# Supplementary material
Source: PubMed Central journal article supplement (PMC4001542)

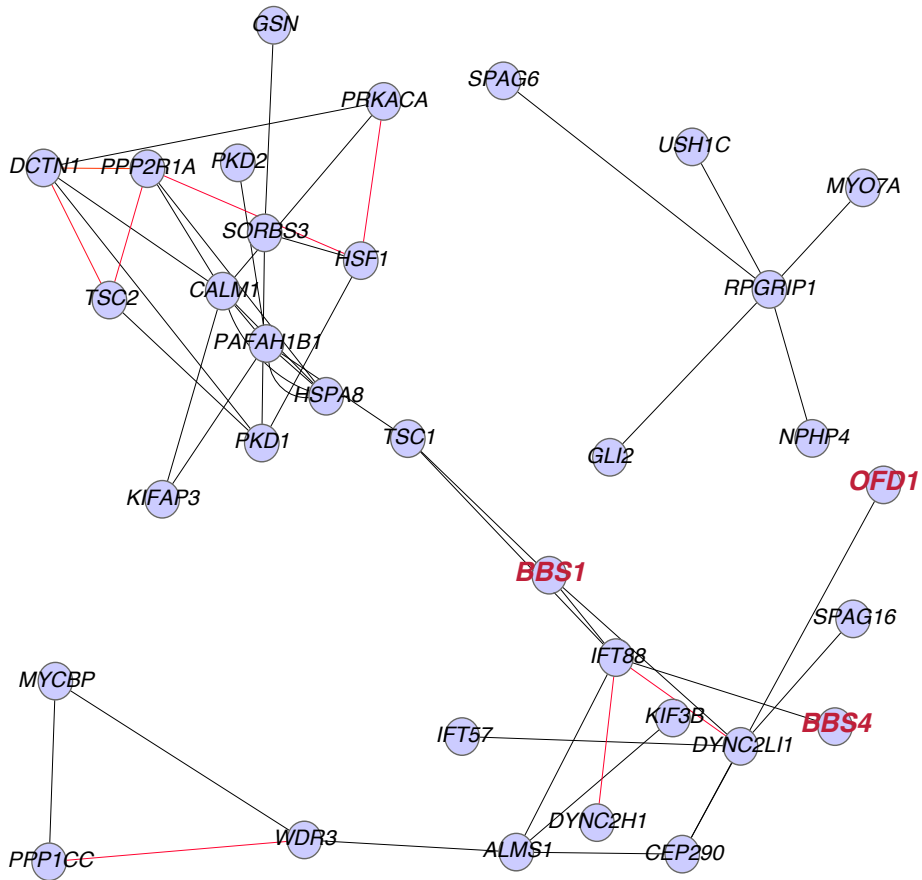

Figure S1

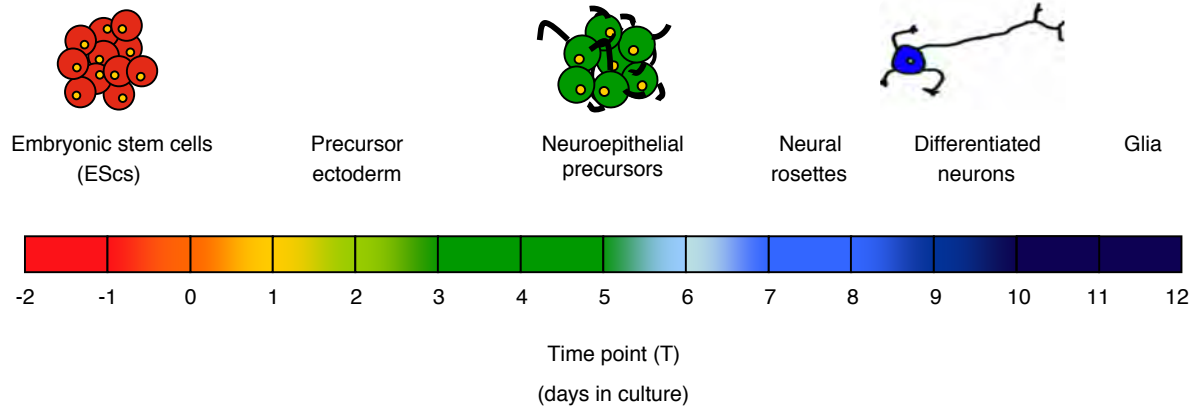

Figure S2

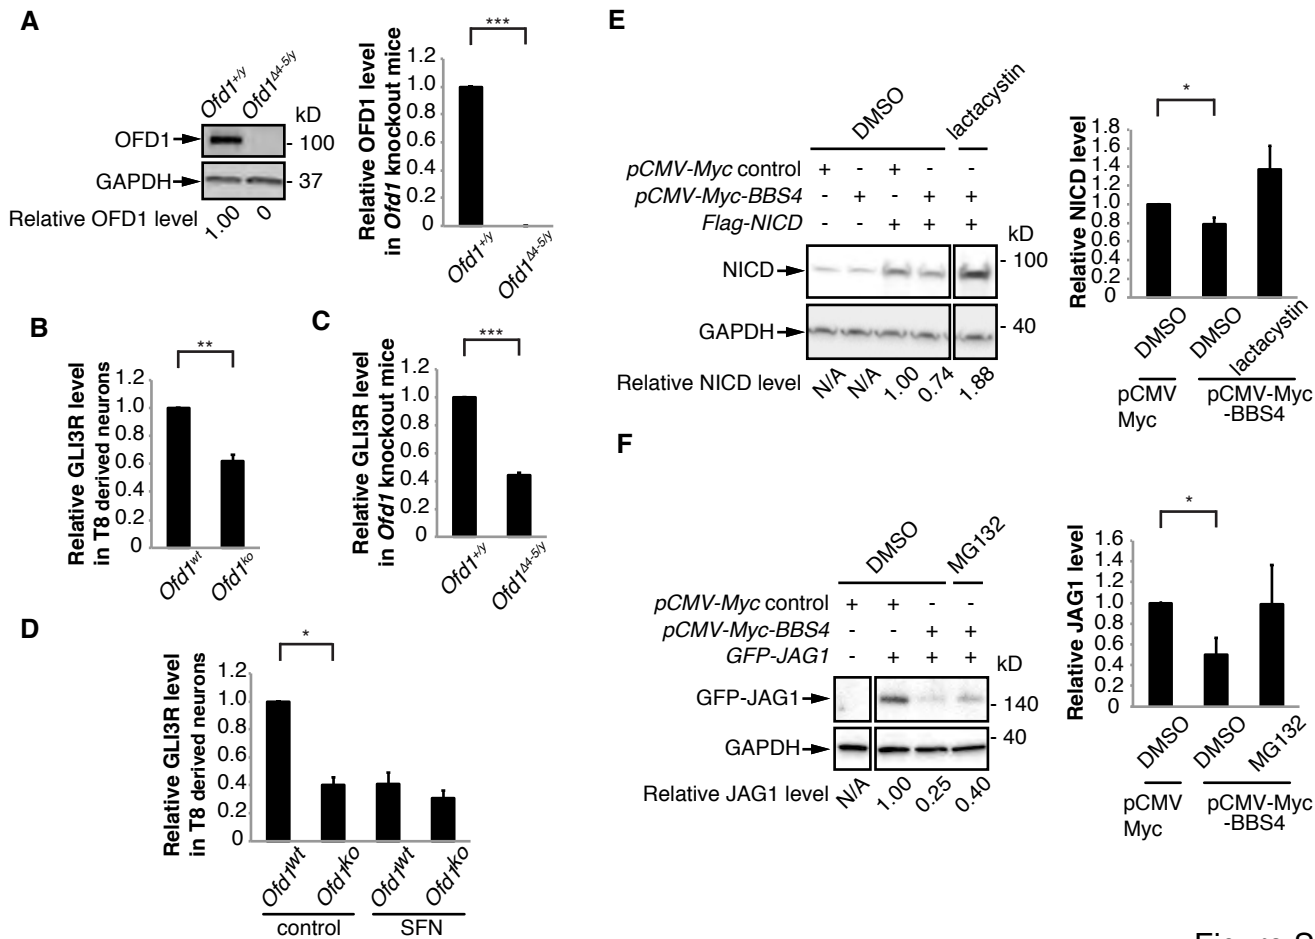

Figure S3

**A**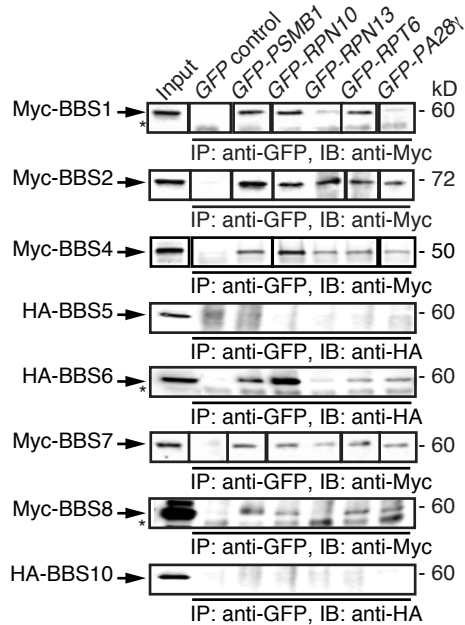**B**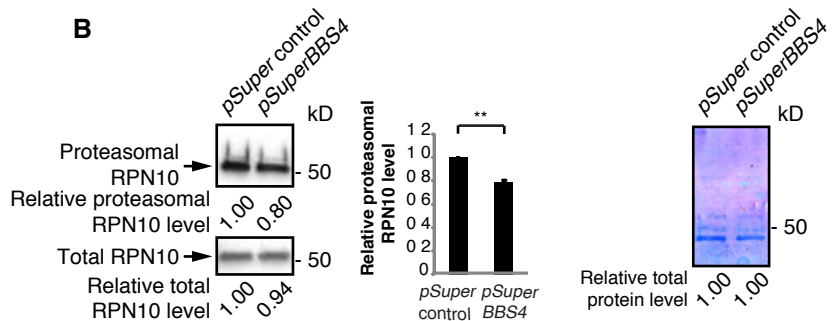**C**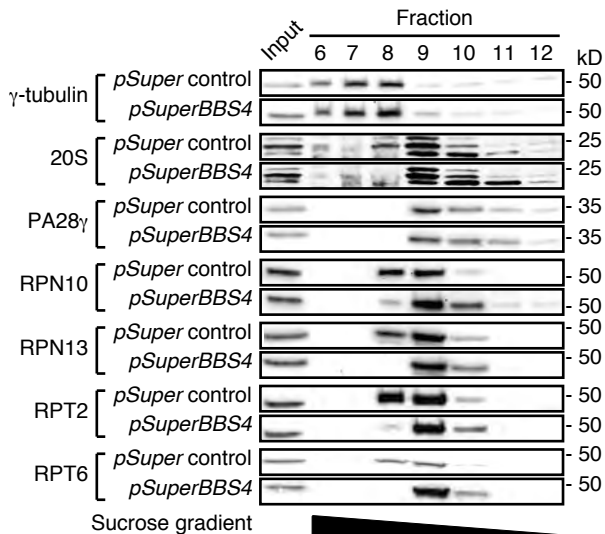

Figure S4

A

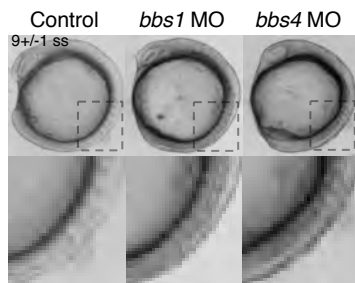

Somitic and CE defects (n = 87)    6% (n = 87)    67% (n = 64)    59% (n = 147)

B

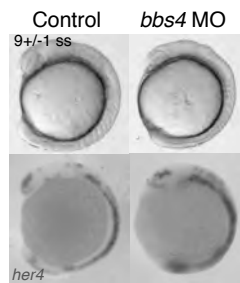

C

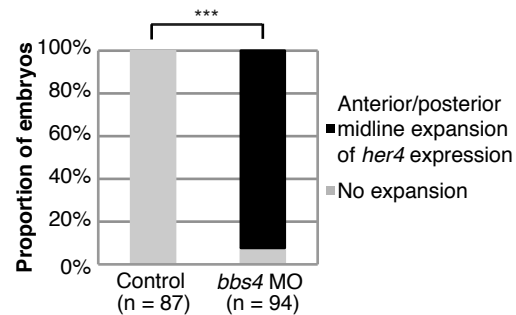

D

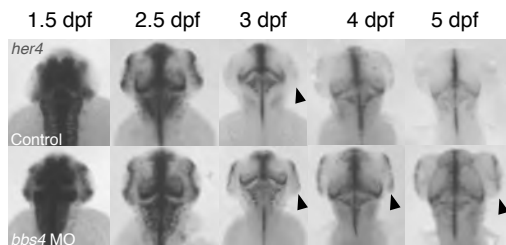

E

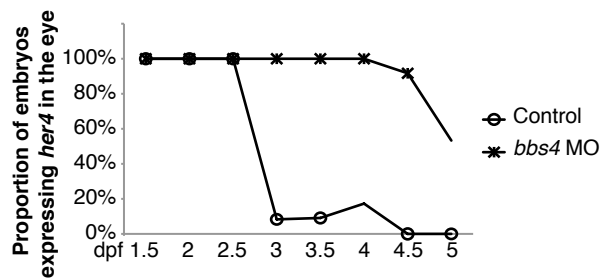

Figure S5

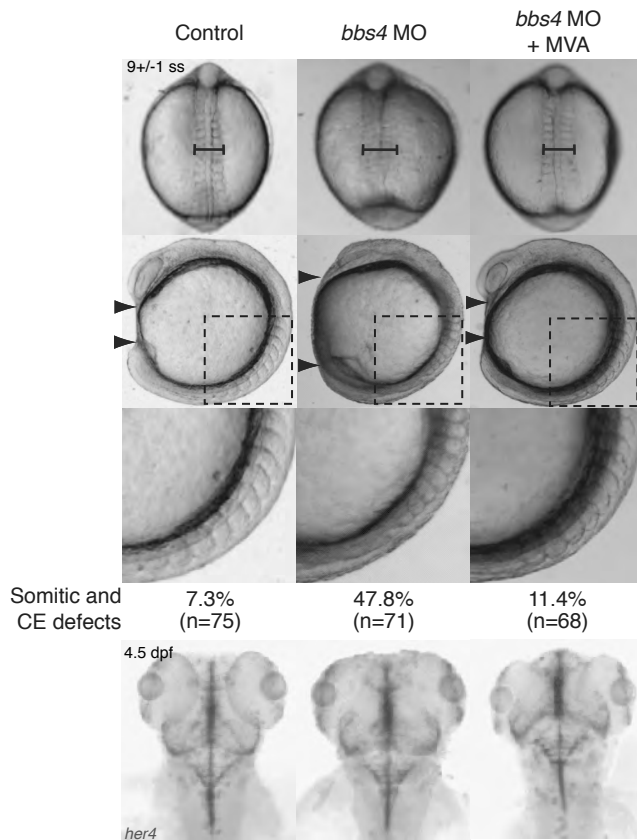

Figure S6

Supplement: JCI71898sd.pdf [file JCI71898sd.pdf]
